# Supplementary material
Source: publisher site journal article supplement (https://www.dovepress.com/article/584684)
Supplement: Supplementary file 1 [file 584684%20Supplementary%20Material.docx]

Original Article

**Immunomodulatory properties of probiotic complex ProbioSEB CSC3 in healthy adults: A prospective, interventional, randomized, double-blinded, parallel-group, placebo-controlled clinical study**

Total Number of Pages: 8

Total number of Figures: 00

Total number of Tables: 04

**Results**

**Table S1:** CONSORT checklist of information for the current clinical trial

| Section/Topic | Item No | Checklist item | Reported on page No |
| --- | --- | --- | --- |
| Title and abstract | | | |
|  | 1a | Identification as a randomised trial in the title | 2 |
| 1b | Structured summary of trial design, methods, results, and conclusions (for specific guidance see CONSORT for abstracts) | 2 |
| Introduction | | | |
| Background and objectives | 2a | Scientific background and explanation of rationale | 3-4 |
| 2b | Specific objectives or hypotheses | 4 |
| Methods | | | |
| Trial design | 3a | Description of trial design (such as parallel, factorial) including allocation ratio | 5-6 |
| 3b | Important changes to methods after trial commencement (such as eligibility criteria), with reasons | 5-6 |
| Participants | 4a | Eligibility criteria for participants | 6 |
| 4b | Settings and locations where the data were collected | 5-6 |
| Interventions | 5 | The interventions for each group with sufficient details to allow replication, including how and when they were actually administered | 6-7 |
| Outcomes | 6a | Completely defined pre-specified primary and secondary outcome measures, including how and when they were assessed | 7 |
| 6b | Any changes to trial outcomes after the trial commenced, with reasons | 6-7 |
| Sample size | 7a | How sample size was determined |  |
| 7b | When applicable, explanation of any interim analyses and stopping guidelines | 6-7 |
| Randomisation: |  |  |  |
| Sequence generation | 8a | Method used to generate the random allocation sequence | 6 |
| 8b | Type of randomisation; details of any restriction (such as blocking and block size) | 6 |
| Allocation concealment mechanism | 9 | Mechanism used to implement the random allocation sequence (such as sequentially numbered containers), describing any steps taken to conceal the sequence until interventions were assigned | 6-7 |
| Implementation | 10 | Who generated the random allocation sequence, who enrolled participants, and who assigned participants to interventions |  |
| Blinding | 11a | If done, who was blinded after assignment to interventions (for example, participants, care providers, those assessing outcomes) and how | 6-7 |
| 11b | If relevant, description of the similarity of interventions |  |
| Statistical methods | 12a | Statistical methods used to compare groups for primary and secondary outcomes | 7-8 |
| 12b | Methods for additional analyses, such as subgroup analyses and adjusted analyses | 7-8 |
| Results | | | |
| Participant flow (a diagram is strongly recommended) | 13a | For each group, the numbers of participants who were randomly assigned, received intended treatment, and were analysed for the primary outcome | 7-8 |
| 13b | For each group, losses and exclusions after randomisation, together with reasons | 7-8 |
| Recruitment | 14a | Dates defining the periods of recruitment and follow-up | 7 |
| 14b | Why the trial ended or was stopped |  |
| Baseline data | 15 | A table showing baseline demographic and clinical characteristics for each group |  |
| Numbers analysed | 16 | For each group, number of participants (denominator) included in each analysis and whether the analysis was by original assigned groups | 7-8 |
| Outcomes and estimation | 17a | For each primary and secondary outcome, results for each group, and the estimated effect size and its precision (such as 95% confidence interval) | 7-9 |
| 17b | For binary outcomes, presentation of both absolute and relative effect sizes is recommended |  |
| Ancillary analyses | 18 | Results of any other analyses performed, including subgroup analyses and adjusted analyses, distinguishing pre-specified from exploratory |  |
| Harms | 19 | All important harms or unintended effects in each group (for specific guidance see CONSORT for harms) | 10-11 |
| Discussion | | | |
| Limitations | 20 | Trial limitations, addressing sources of potential bias, imprecision, and, if relevant, multiplicity of analyses | 14-15 |
| Generalisability | 21 | Generalisability (external validity, applicability) of the trial findings | 11-12 |
| Interpretation | 22 | Interpretation consistent with results, balancing benefits and harms, and considering other relevant evidence | 11-15 |
| Other information | | |  |
| Registration | 23 | Registration number and name of trial registry | 5 |
| Protocol | 24 | Where the full trial protocol can be accessed, if available |  |
| Funding | 25 | Sources of funding and other support (such as supply of drugs), role of funders |  |

**Table S2:** Schedule of events for the clinical study

| Study procedure | Visit 1  (Screening) Day (-) 14 | Run in day(-14) to day 0a | Visit 2  (Baseline)  Day 1 | Visit 3e  (Day of assessment) Day 35±1 | Washout period (21 days)a | Visit 4  (EOS)/ follow-up Day 56±1 |
| --- | --- | --- | --- | --- | --- | --- |
| **Treatment** | |
| Inclusion and exclusion | × |  |  |  |
| Screening and enrolment | × |  |  |  |
| Demographic details | × |  |  |  |
| Vital signs | × | × | × | × |
| Anthropometric b | × | × | × | × |
| Physical examination | × | × | × | × |
| Medical/Surgical/Medication history | × |  |  |  |
| Concomitant medications | × | × | × | × |
| Eligibility re-evaluation and randomization |  | × |  |  |
| WURSS-24 Questionnaire a  Dispensing/review/collection | × | × | × | × |
| HRQoL Questionnaire (PHQ-15 & SF-20) |  | × | × | × |
| Clinical laboratory c |  | × | × |  |
| Urine pregnancy test d | × |  |  |  |
| Tolerability |  |  | × |  |
| Study product dispensing |  | × |  |  |
| Treatment duration |  | (Day 1 to 35) | |  |
| Study product compliance |  |  | × |  |
| AE’s and SAE’s (SE) |  | × | × | × |

×– Symbol indicates that the corresponding study procedure was conducted on that visit;(-) – a minus sign used for pre-treatment screening days to distinguish them from treatment days;a – Assessment will be done on daily basis throughout the study duration from visit 1 to visit 4; b – Weight, height, body mass index, body circumference (arm, waist, hip and calf), waist to hip ratio; c – As per protocol (Appendix-2); d – Applicable for female patients of reproductive age; e – Visit 3 can be on the last day of treatment or within 24 hours after the last done. Appendix 2: Haematological – Complete blood count, differential blood count, platelets; Biochemical tests – SGOT, SGPT, serum creatinine, blood urea nitrogen, random blood sugar, total cholesterol, total albumin, and globulin; C-reactive protein; Immunoglobulins – Serum Ig G, nasal Ig A, serum Ig M; Other immune markers – Serum IFN-γ, IL-4, and IL-10; Innate immunity - NK (CD16, CD56) cells population; Adaptive immunity - Cell population of peripheral blood TH (CD3+), Tc (CD3+, CD8+), B (CD19); and serum cortisol

**Table S3:** Changes in physical parameters of subjects after intervention with the ProbioSEB CSC3 and placebo at the start of treatment (SOT) to the end of treatment (EOT). Results expressed as mean±SD

| Safety parameters | ProbioSEB CSC3 | | | Control | | | p-value (Inter group) |
| --- | --- | --- | --- | --- | --- | --- | --- |
| **SOT** | **EOT** | **EOT-SOT** | **SOT** | **EOT** | **EOT-SOT** |
| Systolic Blood pressure (mmHG) | 123.91 ± 4.67 | 115.89 ± 4.15 | -8.02 ± 6.38 | 122.8 ± 4.08 | 120.61 ± 5.66 | -2.18 ± 6.91 | < 0.001 |
| Diastolic Blood pressure (mmHG) | 78.16 ± 3.89 | 71.32 ± 4.82 | -6.84 ± 5.21 | 77.66 ± 3.36 | 76.41 ± 5.67 | -1.25 ± 6.26 | < 0.001 |
| Pulse rate (beats/min) | 79.48 ± 1.99 | 77.64 ± 2.07 | -1.84 ± 2.61 | 79.75 ± 2.22 | 78.14 ± 3.08 | -1.61 ± 3.64 | 0.415 |
| Respiration rate (breaths/minute) | 18.86 ± 1.34 | 17.48 ± 1.47 | -1.39 ± 2.07 | 18.23 ± 1.16 | 18.23 ± 1.65 | 0 ± 1.98 | 0.037 |
| Temperature (ºF) | 98.10 ± 0.36 | 98.18 ± 0.34 | 0.08 ± 0.44 | 98.49 ± 0.30 | 98.18 ± 0.32 | -0.02 ± 0.43 | 0.815 |

**Table S4:** Changes in haematological and biochemical parameters of subjects after intervention with the ProbioSEB CSC3 and placebo at the start of treatment (SOT) to the end of treatment (EOT). Results expressed as mean±SD

| Safety parameters | ProbioSEB CSC3 | | | Control | | | p-value (Inter group) |
| --- | --- | --- | --- | --- | --- | --- | --- |
| **SOT** | **EOT** | **EOT-SOT** | **SOT** | **EOT** | **EOT-SOT** |
| Hemoglobin (g/dL) | 14.29 ± 0.85 | 14.78 ± 0.70 | 0.49 ± 1.06 | 14.12 ± 1.03 | 14.73 ± 0.76 | 0.61 ± 1.3 | 0.639 |
| RBC (millions/cumm) | 5.17 ± 0.72 | 4.79 ± 0.46 | - 0.38±0.78 | 5.20 ± 0.68 | 4.89 ± 0.52 | - 0.31 ± 0.64 | 0.667 |
| WBC (cells/cumm) | 7541.18 ± 885.76 | 8064.77 ± 1040.09 | 523.59 ± 1109.16 | 7736.39 ± 969.92 | 8183.75 ± 740.76 | 447.36 ± 1244.92 | 0.762 |
| Neutrophils (%) | 49.61 ± 5.08 | 51.39 ± 3.29 | 1.77 ± 3.89 | 48.77 ± 4.76 | 52.14 ± 4.47 | 3.36 ± 5.63 | 0.127 |
| Lymphocytes (%) | 40.93 ± 3.72 | 40.82 ± 3.47 | -0.11 ± 3.49 | 41.23 ± 4.31 | 40.34 ± 3.88 | - 0.89 ± 3.34 | 0.292 |
| Monocytes (%) | 5.93 ± 2.20 | 4.82 ± 1.40 | -1.11 ± 2.63 | 6.09 ± 1.34 | 5.16 ± 1.63 | -0.93 ± 1.92 | 0.712 |
| Eosinophils (%) | 3.07 ± 1.34 | 3.05 ± 1.12 | -0.02 ± 1.52 | 2.91 ± 1.41 | 3.11 ± 1.10 | 0.2 ± 1.46 | 0.475 |
| Basophils (%) | 0.36 ± 0.61 | 0.57 ± 0.87 | 0.2 ± 0.85 | 0.61 ± 0.78 | 0.61 ± 0.81 | 0 ± 0.81 | 0.251 |
| Platelet count (×10ˆ5 cells/cumm) | 3.12 ± 0.8 | 2.96 ± 0.58 | - 0.16 ± 0.59 | 3.27 ± 0.72 | 2.90 ± 0.52 | -0.37 ± 0.67 | 0.12 |
| SGOT (IU/L) | 29.57 ± 2.68 | 27.56 ± 2.23 | - 2.02 ± 2.68 | 29.87 ± 3.09 | 28.14 ± 3.27 | - 1.74 ± 3.64 | 0.683 |
| SGPT (IU/L) | 33.84 ± 4.02 | 30.33 ± 2.79 | -3.52 ± 4.02 | 35.84 ± 3.19 | 31.22 ± 2.63 | - 4.62 ± 3.78 | 0.189 |
| Serum creatininie (mg/dl) | 1.17 ± 0.30 | 1.10 ± 0.25 | -0.08 ± 0.37 | 1.26 ± 0.36 | 1.11 ± 0.28 | - 0.15 ± 0.36 | 0.328 |
| BUN (mg/dL) | 14.06 ± 3.28 | 14.79 ± 1.97 | 0.73 ± 2.65 | 14.07 ± 1.98 | 14.96 ± 2.16 | 0.89 ± 1.73 | 0.73 |
| RBS (mg/dL) | 112.45 ± 9.04 | 116.55 ± 9.36 | 4.09 ± 8.48 | 111.66 ± 7.41 | 116.80 ± 9.65 | 5.14 ± 8.09 | 0.557 |
| Total cholesterol (mg/dL) | 169.55 ± 8.82 | 173.24 ± 10.42 | 3.7 ± 12.22 | 168.11 ± 10.51 | 174.07 ± 8.13 | 5.95 ± 12.45 | 0.393 |
| Total albumin (g/dL) | 3.68 ± 0.48 | 4.21 ± 0.47 | 0.53 ± 0.67 | 3.72 ± 0.47 | 4.25 ± 0.35 | 0.53 ± 0.53 | 0.97 |
| Globulin (g/dL) | 3.4 ± 0.48 | 3.21 ± 0.25 | - 0.19 ± 0.53 | 3.31 ± 0.41 | 3.2 ± 0.39 | - 0.11 ± 0.37 | 0.41 |
